# Supplementary material
Source: Springer Nature journal article supplement (https://www.springermedizin.de/resource/supplementary/10194_2013_287_MOESM1_ESM.pdf/9422616)

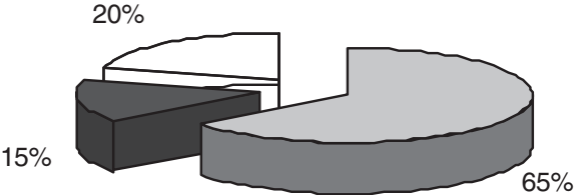

Chiari malformation type I

posterior fossa lesions

other

Supplement: MOESM1 [file 9422616]
